# Supplementary material for: Combining Genetic and Demographic Data for the Conservation of a Mediterranean Marine Habitat-Forming Species
Source: PLoS One. 2015 Mar 16;10(3):e0119585. doi: 10.1371/journal.pone.0119585 (PMC4361678; doi:10.1371/journal.pone.0119585)
Supplement: S1 Dataset — (XLSX) [file pone.0119585.s001.xlsx]

## Sheet: Ibiza
Population	Allele A	Allele B	Allele A	Allele B	Allele A	Allele B	Allele A	Allele B	Allele A	Allele B	Allele A	Allele B	Allele A	Allele B
Escull de Tramontana	Pcla12		Pcla14		Pcla17		Pcla9		Pcla-a		Pcla10		Pcla81
ETR01	87	113	165	175	175	175	93	107	163	199	204	218	186	198
ETR02	87	113	0	0	171	177	95	107	169	175	218	230	198	201
ETR03	109	113	165	179	171	171	115	117	166	169	218	240	195	198
ETR04	113	117	175	191	171	175	95	95	166	166	212	214	198	198
ETR05	113	119	179	201	171	177	107	107	166	205	214	218	198	201
ETR06	107	113	165	165	177	177	95	111	166	205	202	212	198	198
ETR07	113	113	165	179	171	177	107	117	166	166	212	214	198	198
ETR08	87	113	165	179	171	175	113	127	157	199	202	212	198	198
ETR09	113	113	165	165	171	177	107	111	157	199	214	230	198	198
ETR10	105	113	165	179	171	171	107	109	163	163	212	218	174	198
ETR11	87	115	0	0	171	177	95	107	163	205	222	230	186	198
ETR12	113	113	165	179	171	175	107	127	157	166	204	218	198	201
ETR13	105	119	0	0	175	175	107	125	166	166	202	216	198	198
ETR14	113	113	179	179	171	175	111	113	166	205	212	218	174	198
ETR15	101	113	171	181	171	175	95	107	172	202	230	230	186	198
ETR16	87	113	165	171	175	177	115	121	163	166	214	218	198	198
ETR17	113	113	165	193	171	177	107	111	166	169	218	230	174	198
ETR18	105	113	165	171	171	175	107	107	166	166	212	220	186	201
ETR19	113	119	165	165	171	171	111	111	166	166	214	218	198	201
ETR20	111	113	165	179	171	177	107	107	163	166	212	218	198	198
ETR21	87	113	0	0	175	175	111	125	172	199	204	214	198	198
ETR22	87	113	165	179	175	175	95	125	166	169	204	218	186	198
ETR23	105	113	165	171	171	175	127	127	163	166	206	218	174	177
ETR24	107	119	171	179	175	187	95	95	163	199	204	212	198	198
ETR25	113	113	165	165	171	175	91	111	166	166	212	222	198	198
ETR26	105	113	165	175	171	177	107	111	166	205	214	222	198	201
ETR27	105	119	179	179	171	171	107	127	166	199	218	218	174	198
ETR28	105	113	187	193	171	171	107	109	163	166	218	218	198	198
ETR29	113	119	175	181	171	177	107	107	163	166	206	240	174	198
ETR30	105	119	179	189	171	173	111	127	157	169	206	212	198	207
ETR31	105	113	165	165	177	187	95	127	163	202	214	220	174	201
ETR32	113	113	165	179	177	177	107	111	199	202	212	222	198	198
ETR33	105	119	179	179	171	171	115	125	172	205	212	232	174	198
ETR34	103	105	165	165	171	177	95	107	172	199	202	214	198	198
ETR35	119	131	165	189	173	175	111	127	166	166	204	206	177	198
ETR36	107	113	167	179	177	177	107	111	163	169	208	230	183	186
ETR37	105	119	165	183	175	177	107	117	166	169	212	222	174	198
ETR38	105	113	165	175	171	171	107	111	166	205	218	218	174	198
pop
Cap Vermell Deep	Pcla12		Pcla14		Pcla17		Pcla9		Pcla-a		Pcla10		Pcla81
CVD01	105	109	165	179	171	177	107	107	163	199	212	214	198	198
CVD02	105	107	165	179	171	175	127	127	169	172	204	216	186	198
CVD03	113	113	165	175	171	177	107	109	166	166	218	218	174	186
CVD04	105	113	179	193	171	177	107	127	166	172	214	222	198	198
CVD05	87	113	165	179	171	175	91	109	166	166	218	230	198	198
CVD06	119	131	165	193	175	175	107	109	163	199	218	222	198	198
CVD07	105	113	165	165	175	175	95	127	166	172	218	222	198	198
CVD08	113	113	179	185	171	175	107	127	166	166	214	218	198	201
CVD11	113	119	165	165	171	175	111	111	166	166	218	218	198	198
CVD12	113	113	165	179	175	177	95	111	169	199	222	222	186	204
CVD13	113	113	165	179	171	175	107	107	166	172	206	214	195	198
CVD14	105	117	179	193	175	175	91	107	166	199	218	230	198	198
CVD15	105	113	165	165	171	187	95	127	169	199	218	218	186	198
CVD16	113	119	165	167	171	171	107	111	166	169	212	218	198	198
CVD17	105	119	165	175	177	177	95	107	166	199	218	222	174	198
CVD18	107	113	179	179	175	177	91	91	163	169	218	222	186	198
CVD19	87	113	171	179	171	177	107	107	163	166	218	240	174	198
CVD20	113	113	165	165	175	177	109	109	166	199	204	218	186	201
CVD21	117	117	179	201	175	175	107	111	163	166	212	240	198	198
CVD22	87	119	179	179	171	173	95	107	166	199	218	242	198	198
CVD23	113	119	165	179	171	177	107	123	169	172	204	216	198	198
CVD24	113	113	165	179	175	175	125	127	163	166	212	212	186	198
CVD25	105	113	165	179	171	177	95	127	166	166	214	214	195	198
CVD26	105	113	165	181	171	177	95	111	166	166	216	218	186	198
CVD27	119	119	165	165	171	177	91	111	172	199	218	218	198	198
CVD28	109	113	165	165	175	175	111	111	163	166	212	232	186	198
CVD29	113	113	165	165	175	177	109	127	163	199	212	218	198	201
CVD30	113	113	165	171	175	175	95	107	163	166	204	222	198	198
CVD31	113	113	165	185	175	177	95	107	166	199	204	218	198	201
CVD32	113	115	171	175	175	175	95	109	166	202	212	218	186	201
CVD33	107	119	175	175	175	175	111	123	172	199	214	232	198	198
CVD34	113	119	165	179	171	171	109	123	169	199	204	232	198	198
CVD35	113	113	165	165	171	175	107	109	163	166	218	230	198	198
CVD36	113	113	165	201	171	171	107	107	199	202	230	232	186	198
CVD38	105	113	165	165	171	177	107	111	163	166	212	216	198	198
CVD39	105	119	165	177	171	177	91	107	163	199	232	240	183	198
pop
Cap Vermell Shallow	Pcla12		Pcla14		Pcla17		Pcla9		Pcla-a		Pcla10		Pcla81
CVS01	105	113	165	179	175	177	107	107	163	202	222	222	174	186
CVS02	109	113	167	173	171	175	107	111	166	199	218	218	198	198
CVS03	107	109	165	173	171	175	107	127	166	166	218	232	198	201
CVS04	113	119	165	201	175	177	95	109	166	166	212	222	174	198
CVS05	113	113	165	173	171	175	111	127	166	166	218	218	198	201
CVS06	119	131	165	179	175	175	107	109	166	172	206	212	186	198
CVS07	113	117	165	175	171	175	107	109	166	199	212	212	198	207
CVS08	113	113	165	165	171	171	95	95	163	163	212	212	198	198
CVS09	105	119	177	193	171	177	107	111	163	163	212	240	186	198
CVS10	113	115	165	175	177	177	107	107	166	199	206	222	198	198
CVS11	113	119	165	201	171	177	91	107	163	169	218	232	174	201
CVS12	107	113	165	181	177	177	107	107	163	166	218	226	198	198
CVS13	105	115	165	179	175	177	107	125	199	199	218	218	198	201
CVS14	113	117	165	179	171	171	109	127	169	199	218	240	174	198
CVS16	105	105	165	165	175	175	109	127	166	169	218	244	198	207
CVS17	113	119	165	179	171	171	95	111	166	199	218	218	174	198
CVS18	113	119	165	171	171	177	111	125	157	166	212	214	183	198
CVS19	87	107	165	191	175	175	91	95	166	166	212	236	174	198
CVS20	105	107	165	179	171	171	107	127	166	166	218	218	201	201
CVS21	115	117	179	181	171	171	91	107	166	199	218	232	174	198
CVS22	119	119	0	0	175	177	107	127	163	199	218	244	198	201
CVS23	113	115	165	179	171	175	125	127	166	166	214	232	198	201
CVS24	107	119	165	167	171	175	95	111	166	202	212	218	186	198
CVS25	115	117	165	165	175	175	107	109	166	199	206	218	198	198
CVS26	105	113	165	179	175	175	107	107	166	202	218	220	198	198
CVS27	113	113	165	165	171	171	95	107	172	199	216	232	186	198
CVS28	113	113	165	175	177	177	111	117	166	169	218	218	186	198
CVS29	117	119	165	179	171	175	95	107	166	199	218	218	186	198
CVS30	105	113	171	179	175	177	95	107	172	199	212	218	186	198
CVS31	87	107	165	171	171	171	111	127	166	172	214	214	198	201
CVS32	87	113	165	171	171	171	123	127	199	199	218	218	174	186
CVS33	87	113	165	179	175	177	107	109	166	166	214	230	201	207
CVS34	113	115	179	179	169	175	107	107	199	202	214	218	186	201
CVS36	105	113	165	179	171	181	107	111	169	202	218	226	198	201
CVS37	113	117	175	179	171	171	111	127	163	172	218	218	183	186
CVS38	107	119	179	185	175	177	111	115	166	172	218	230	186	198
CVS39	105	107	165	191	171	175	95	123	202	202	218	218	198	198
CVS40	87	113	165	179	175	177	107	109	163	199	218	230	198	201
CVS41	107	113	165	179	171	175	109	123	166	199	212	230	174	198
CVS42	113	119	171	193	171	177	107	127	163	199	212	214	198	198
CVS43	87	113	165	165	171	177	107	123	166	166	212	218	198	198
CVS44	105	113	181	201	175	175	111	127	166	199	218	218	198	198
CVS45	113	119	171	175	171	171	95	111	166	172	218	232	186	198
CVS46	119	119	0	0	175	177	127	127	163	166	214	218	198	198
pop
Na Bosc Deep	Pcla12		Pcla14		Pcla17		Pcla9		Pcla-a		Pcla10		Pcla81
NBD01	113	113	0	0	171	173	125	127	157	163	218	222	174	183
NBD02	109	113	165	179	171	175	107	117	163	172	230	238	183	198
NBD03	105	113	165	179	171	175	125	127	157	166	214	218	198	207
NBD04	107	113	165	179	171	171	107	127	166	166	212	214	174	198
NBD05	101	113	179	179	171	187	91	127	163	166	208	218	174	207
NBD06	105	117	179	179	171	175	95	111	163	202	212	222	198	198
NBD07	113	113	175	179	177	187	91	111	166	166	214	218	177	198
NBD08	109	127	165	165	171	171	95	115	166	166	212	240	198	198
NBD09	107	113	165	171	171	175	111	111	163	166	212	218	177	198
NBD10	105	113	179	199	171	177	127	127	163	166	202	218	174	177
NBD11	113	119	165	179	171	177	107	111	157	169	208	232	198	198
NBD12	105	113	165	179	171	177	107	107	166	166	218	220	198	201
NBD14	87	87	165	179	173	177	91	95	166	166	222	240	198	198
NBD16	105	113	171	197	171	177	115	117	163	163	230	240	183	198
NBD18	105	119	165	179	175	177	107	127	0	0	214	240	198	198
NBD19	105	119	171	179	171	175	111	127	166	166	214	240	177	183
NBD20	119	131	179	179	171	173	107	111	199	199	214	218	198	201
NBD22	113	113	171	179	171	175	95	107	166	166	218	218	177	198
NBD23	105	109	171	205	171	171	91	127	160	202	210	240	198	207
NBD24	113	113	171	179	171	175	91	127	163	166	218	240	174	183
NBD25	105	119	165	201	171	175	107	111	166	199	214	218	174	201
NBD26	87	119	165	171	175	177	95	127	166	166	214	218	174	186
NBD27	101	131	171	179	171	177	95	109	163	205	212	226	183	198
NBD28	105	105	165	165	175	177	109	141	166	166	208	240	201	201
pop
Na Bosc Shallow	Pcla12		Pcla14		Pcla17		Pcla9		Pcla-a		Pcla10		Pcla81
NBS01	113	113	179	199	171	171	95	111	166	166	218	230	198	198
NBS02	119	131	165	179	171	175	115	125	157	199	218	218	174	198
NBS03	107	131	165	171	171	187	125	127	163	166	202	232	174	198
NBS04	113	113	165	179	171	187	127	127	166	166	212	240	174	198
NBS05	113	113	179	179	173	187	95	107	166	166	212	240	198	201
NBS06	113	133	165	179	171	175	95	111	166	166	218	222	174	201
NBS07	113	113	165	171	175	177	107	111	199	202	214	218	198	198
NBS08	113	113	165	179	171	175	107	109	199	205	214	218	201	201
NBS10	105	113	171	171	171	171	107	111	157	166	218	240	201	207
NBS11	107	113	179	179	171	175	111	117	166	172	210	214	174	198
NBS12	113	113	165	165	171	171	91	111	166	166	230	246	186	198
NBS13	107	113	171	179	171	175	109	111	166	172	214	234	183	198
NBS14	107	119	179	179	171	171	95	111	172	199	214	214	174	183
NBS15	113	131	165	179	171	177	111	125	166	166	218	218	174	198
NBS16	105	113	179	179	175	175	91	95	199	199	212	218	174	174
NBS17	101	113	179	179	171	171	107	117	172	199	206	232	177	198
NBS18	113	113	171	179	171	177	95	125	166	202	214	240	183	183
NBS19	87	119	165	179	171	171	107	107	166	166	214	218	189	198
NBS20	101	105	165	179	171	175	95	143	166	172	218	240	174	207
NBS21	105	113	179	199	171	177	107	127	166	199	212	218	198	198
NBS22	119	131	165	175	175	175	109	127	163	199	208	218	174	183
NBS23	107	113	177	179	171	177	129	141	157	166	218	242	198	198
NBS24	113	131	179	195	171	175	91	127	166	166	210	214	198	198
NBS25	113	113	165	183	175	175	95	111	166	169	214	218	174	183
NBS26	87	113	171	179	171	173	107	127	157	166	212	218	174	201
NBS27	105	113	165	179	171	177	107	109	172	199	206	240	174	201
NBS28	113	119	179	179	171	171	95	95	163	166	212	218	174	198
NBS29	113	119	0	0	171	171	95	95	166	172	212	218	198	198
pop
Es Vaixell Deep	Pcla12		Pcla14		Pcla17		Pcla9		Pcla-a		Pcla10		Pcla81
EVD01	113	113	165	179	171	177	91	107	166	199	218	240	198	198
EVD02	109	113	165	179	175	177	95	127	166	166	212	212	174	198
EVD03	87	113	179	183	177	177	91	107	163	166	232	240	174	198
EVD04	113	119	165	175	175	177	107	111	163	166	204	214	177	183
EVD05	113	113	179	179	175	177	91	109	166	199	240	240	198	198
EVD06	105	119	171	175	171	171	107	111	163	166	240	240	183	198
EVD07	87	101	179	179	175	175	91	107	166	199	218	240	183	198
EVD08	107	119	171	171	171	187	95	127	166	166	218	226	198	198
EVD09	113	113	165	175	171	171	111	127	166	166	218	220	174	177
EVD10	113	113	165	179	175	177	95	107	163	202	214	218	198	198
EVD11	113	117	165	179	171	175	91	117	202	202	224	240	183	201
EVD12	87	113	165	179	175	187	107	107	163	199	206	218	198	198
EVD13	87	113	165	165	175	177	107	109	199	199	218	236	174	201
EVD14	87	119	165	179	175	175	95	109	166	202	218	232	186	198
EVD15	105	113	165	179	171	175	117	117	163	202	218	218	183	198
EVD16	87	113	165	201	175	175	107	141	163	169	214	230	198	201
EVD17	105	113	179	179	171	177	107	127	199	199	216	230	198	198
EVD18	119	131	171	179	175	177	107	107	166	166	210	218	174	174
EVD20	87	113	165	193	171	171	95	117	163	166	218	218	198	198
EVD21	105	107	179	179	171	171	109	111	163	202	218	220	198	201
EVD22	113	113	165	179	171	187	91	107	166	166	212	212	174	198
EVD23	87	113	165	179	171	171	0	0	169	199	212	240	198	198
EVD24	113	113	175	179	171	171	91	107	199	202	218	222	198	198
EVD25	113	113	167	185	171	175	111	127	163	166	212	214	198	198
EVD26	105	113	165	175	171	171	107	111	166	166	218	240	183	198
EVD27	87	119	179	179	175	177	95	121	163	202	218	218	174	198
EVD29	113	113	167	171	171	177	107	111	163	166	202	214	177	198
pop
Es Vaixell Shallow	Pcla12		Pcla14		Pcla17		Pcla9		Pcla-a		Pcla10		Pcla81
EVS01	113	113	167	179	171	171	95	95	166	187	208	230	174	198
EVS02	87	119	179	179	175	177	107	107	166	166	206	218	183	198
EVS03	109	119	177	193	171	177	95	107	163	208	216	218	198	201
EVS04	87	105	165	179	175	175	107	107	166	199	212	214	177	198
EVS05	109	131	165	169	177	177	91	129	163	166	212	218	198	198
EVS06	113	113	165	171	177	177	111	121	166	190	214	218	198	198
EVS07	107	113	179	179	171	177	91	107	166	166	212	230	174	177
EVS08	87	113	167	179	171	177	95	107	199	202	212	220	177	201
EVS09	113	119	171	179	171	175	91	91	166	166	218	232	174	198
EVS10	113	113	179	203	171	171	91	95	166	187	206	218	174	198
EVS11	87	113	171	179	171	175	95	125	163	199	236	238	201	207
EVS13	113	113	175	179	171	171	95	107	163	166	206	230	198	201
EVS14	113	113	177	179	175	177	111	117	166	166	206	240	177	177
EVS15	113	119	179	179	171	175	95	109	166	166	206	218	198	198
EVS16	113	113	165	171	171	175	95	127	163	166	206	218	198	201
EVS18	113	119	179	179	171	175	95	107	163	208	206	218	198	198
EVS19	87	113	165	179	177	177	95	95	163	166	218	242	186	207
EVS20	113	115	165	175	175	177	111	111	163	166	212	240	174	177
EVS21	105	113	175	187	171	171	95	111	163	169	204	240	174	198
EVS22	105	113	165	179	171	175	95	125	166	166	206	232	183	198
EVS23	105	113	165	179	171	177	95	95	157	166	202	240	183	186
EVS24	113	119	165	171	177	177	127	129	163	202	202	218	174	198
EVS25	107	113	179	179	175	175	95	125	166	166	206	218	183	201
EVS26	105	113	177	179	171	177	95	117	0	0	218	240	0	0
EVS27	113	131	165	173	171	175	91	127	166	166	220	240	174	207
EVS28	113	119	165	171	175	177	109	131	163	166	202	218	174	207
EVS29	105	113	165	179	175	177	109	127	163	166	216	218	198	207
EVS30	87	131	165	179	171	175	111	125	166	202	206	220	201	207
EVS31	101	113	179	179	175	175	95	107	163	166	202	206	198	198
EVS32	113	113	171	179	171	171	95	115	163	187	218	232	174	186
EVS33	101	105	165	179	171	177	111	125	166	166	218	232	183	198
EVS34	113	117	171	193	171	177	91	111	157	202	206	230	198	207
EVS35	119	131	177	179	171	171	107	107	163	166	206	214	198	198
EVS36	105	113	179	179	175	179	95	107	157	199	202	240	198	198
pop
Es Vedrà Deep	Pcla12		Pcla14		Pcla17		Pcla9		Pcla-a		Pcla10		Pcla81
EDD01	113	113	179	193	171	171	91	107	163	169	210	230	198	201
EDD02	107	121	165	179	175	177	117	125	169	169	208	212	174	192
EDD03	107	113	165	179	171	171	91	125	163	163	218	228	192	198
EDD04	105	113	179	187	175	175	91	107	166	169	218	218	174	183
EDD05	107	113	193	199	171	177	119	123	166	169	208	218	183	186
EDD06	107	113	179	179	171	177	111	117	166	169	208	218	174	183
EDD07	109	113	179	191	171	175	111	125	157	166	208	230	198	201
EDD09	113	113	165	171	173	177	111	111	169	169	212	230	174	201
EDD11	113	115	165	179	173	175	91	107	163	169	210	218	183	201
EDD12	107	113	179	185	177	177	107	111	166	169	218	232	198	201
EDD13	107	113	165	191	173	175	111	111	163	169	208	218	174	174
EDD14	107	113	179	199	171	175	107	107	157	202	218	218	174	201
EDD15	119	121	165	171	171	175	125	125	163	163	208	232	174	174
EDD17	113	119	171	191	175	177	117	125	163	169	208	208	198	201
EDD18	107	121	165	193	175	175	111	127	166	169	210	218	198	201
EDD19	107	119	193	199	171	177	107	117	163	169	208	208	198	201
EDD20	107	113	179	193	171	173	117	117	163	163	218	230	198	201
EDD21	107	107	165	179	175	177	91	91	163	166	218	230	186	201
EDD22	107	107	193	199	171	175	91	125	166	166	208	230	174	201
EDD23	113	113	179	199	171	177	91	125	166	169	208	230	183	198
EDD24	107	107	171	199	171	177	111	125	166	169	218	218	174	198
EDD25	107	113	165	171	173	177	107	117	163	169	208	218	183	198
EDD26	107	113	171	199	171	173	111	113	157	163	210	230	183	198
EDD28	113	113	179	199	175	177	107	125	163	169	208	210	183	198
EDD31	107	113	167	171	171	175	95	107	157	163	210	218	183	192
EDD32	107	113	191	197	171	175	107	117	166	169	218	230	198	201
EDD33	107	109	165	179	171	173	107	117	169	169	212	218	192	198
EDD34	107	107	165	173	171	177	107	115	169	169	212	230	183	201
EDD36	107	113	179	193	173	175	91	127	166	166	208	218	201	201
EDD37	107	107	171	199	171	175	107	125	163	169	218	218	198	201
EDD39	107	119	171	179	171	175	91	125	163	169	208	232	174	201
EDD40	113	113	171	193	171	177	113	117	163	163	218	230	177	192
EDD41	113	115	179	199	175	177	109	115	163	166	218	218	183	198
EDD42	113	113	199	199	171	175	115	117	163	166	218	230	183	198
EDD43	107	113	179	197	171	175	91	127	157	163	218	226	186	198
EDD44	113	113	165	193	175	177	91	107	166	169	208	208	198	201
pop
Es Vedrà Shallow	Pcla12		Pcla14		Pcla17		Pcla9		Pcla-a		Pcla10		Pcla81
EDS01	111	113	171	179	171	175	117	117	166	169	218	220	192	201
EDS02	113	123	165	171	173	175	117	127	163	163	208	208	201	201
EDS03	113	113	179	179	175	175	109	111	166	169	208	218	198	201
EDS04	113	113	171	173	171	177	107	127	163	166	208	208	198	201
EDS05	107	113	165	183	175	175	95	107	166	169	218	230	174	198
EDS06	113	119	175	183	175	175	107	107	169	169	212	228	201	201
EDS08	107	113	165	173	175	175	107	111	163	169	208	212	198	201
EDS09	107	113	179	199	175	177	107	107	163	169	218	230	198	198
EDS10	109	109	171	197	177	177	107	109	166	169	218	230	183	201
EDS11	105	105	193	199	171	173	107	117	166	169	218	232	174	201
EDS12	107	107	179	199	171	173	117	127	166	169	212	218	201	201
EDS13	113	119	187	199	171	177	91	117	169	169	208	218	192	198
EDS14	113	113	171	187	171	175	117	127	169	202	208	218	198	201
EDS15	113	113	165	197	171	177	107	127	166	166	228	230	198	201
EDS16	113	113	179	199	171	177	107	111	166	169	208	218	183	201
EDS17	113	113	197	199	175	177	111	113	166	169	212	218	174	201
EDS18	113	115	165	199	175	177	107	125	169	169	218	232	192	201
EDS19	87	121	179	179	177	177	107	125	157	166	218	218	174	201
EDS20	113	113	171	179	173	173	111	127	166	169	208	232	183	201
EDS21	113	113	191	199	171	177	107	127	163	169	218	218	183	201
EDS22	113	113	173	175	175	175	111	117	163	169	212	218	183	198
EDS23	109	113	179	197	175	177	107	107	163	169	220	230	174	183
EDS24	107	113	165	171	171	175	107	117	166	169	210	218	183	201
EDS25	107	123	171	179	171	171	107	111	166	169	208	226	174	198
EDS26	113	115	179	179	175	177	91	107	163	166	218	230	201	201
EDS27	107	113	165	171	171	175	107	117	166	169	210	218	183	198
EDS29	107	113	175	199	175	175	91	111	169	199	208	218	201	201
EDS30	113	113	179	199	175	175	107	111	163	169	218	218	174	201
EDS31	107	113	171	171	173	175	117	127	169	169	218	218	174	174
EDS32	87	121	165	199	171	175	107	123	166	169	218	218	192	198
EDS34	105	113	165	179	175	177	107	117	163	169	208	230	192	201
EDS35	107	119	165	179	171	175	111	127	163	166	218	218	174	201
EDS36	113	115	171	193	173	175	117	127	166	166	208	218	198	201
EDS37	113	113	165	179	171	175	107	117	157	166	208	212	174	201
